# Supplementary material for: Rich in Phenolics—Strong Antioxidant Fruit? Comparative Study of 25 Strawberry Cultivars
Source: MDPI journal article supplement (doi:10.3390/plants11243566), 2022-12-17
Supplement: s1 [file s1]

## Article

# Rich in Phenolics—Strong Antioxidant Fruit? Comparative Study of 25 Strawberry Cultivars

Dragica M. Milosavljević <sup>1</sup>, Vuk M. Maksimović <sup>1</sup>, Jasminka M. Milivojević <sup>2</sup>, Đura J. Nakarada <sup>3</sup>, Miloš D. Mojević <sup>3</sup> and Jelena J. Dragišić Maksimović <sup>1,\*</sup>

**Table S1.** The glycosylation pattern (%) of phenolic compounds in strawberry fruit extracts.

|                        |                     |       |
|------------------------|---------------------|-------|
| Anthocyanins           | Glycosides          | 92.23 |
|                        | Acetyl form         | 7.77  |
|                        | Glucoside           | 87.79 |
|                        | Rutinoside          | 4.44  |
|                        | Acetylglucoside     | 0.43  |
|                        | Malonylglucoside    | 7.34  |
| Derivatives of phenols | Glycosides          | 44.94 |
|                        | Acetyl form         | 55.06 |
|                        | Glucuronide         | 26.08 |
|                        | Glucoside           | 15.14 |
|                        | Acetylglucoside     | 1.56  |
|                        | Coumaroyl glucoside | 53.50 |
|                        | Deoxyhexoside       | 3.71  |
| Free forms             |                     | 11.69 |

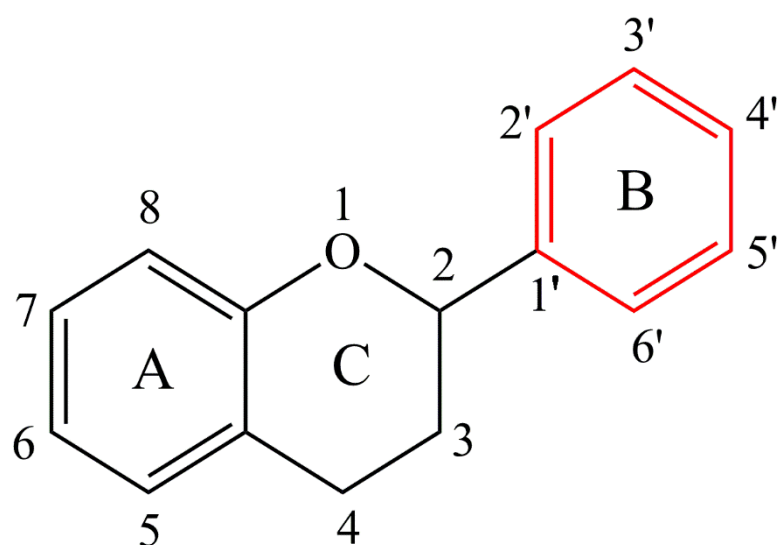

**Figure S1.** Basic structure of flavonoids.
